# Supplementary material for: Endothelial cells respond to the direction of mechanical stimuli through SMAD signaling to regulate coronary artery size
Source: Oxford University Press journal article supplement (doi:10.1242/dev.150904), 2017-07-31
Supplement: dev150904supp.pdf [file dev150904supp.pdf]

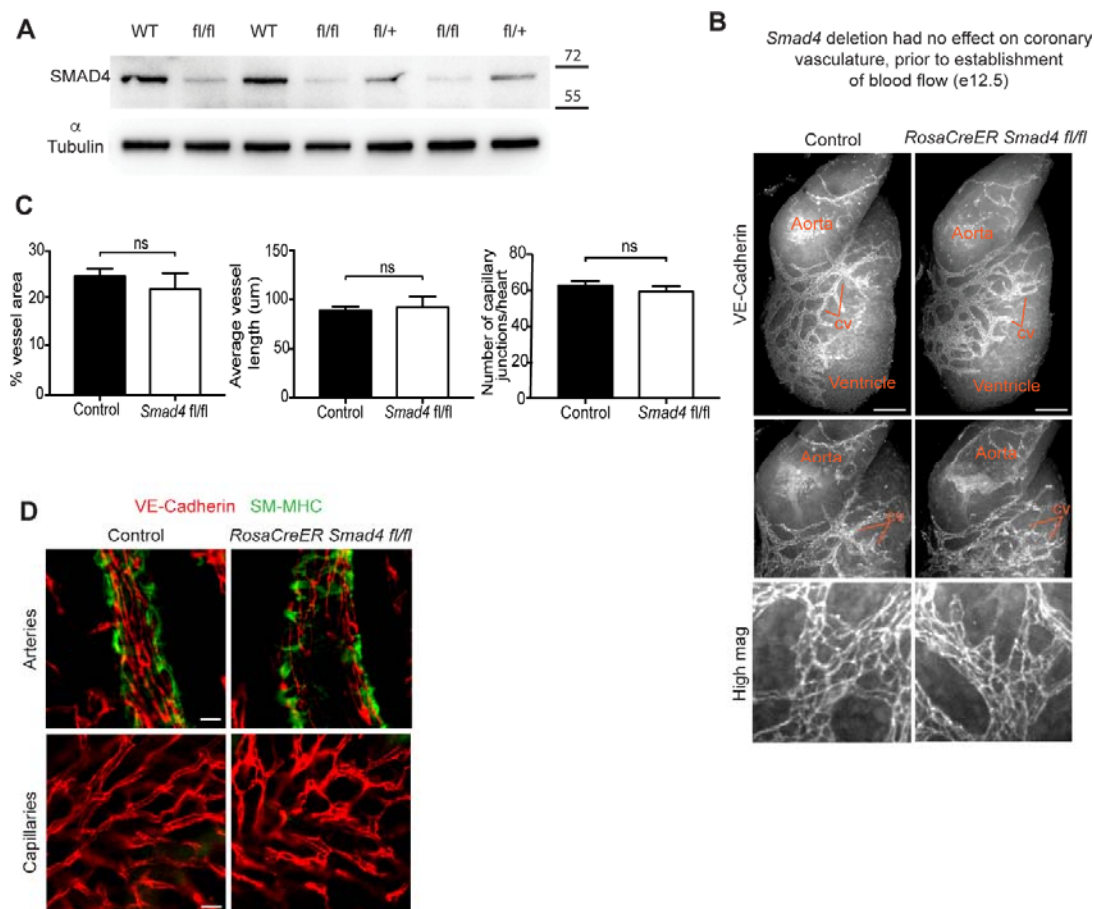

**Figure S1. Vessel phenotypes in *Smad4* deficient mice.** (A) Western analysis of SMAD4 in embryo lysates shows a dose dependent depletion of SMAD4 in wild type, *Smad4 fl/+*, and *Smad4 fl/fl* animals. (B) Imaging of e12.5 *RosaCreER Smad4 floxed* animals. The coronary vascular plexus, including peritruncal vessels near the aorta, is comparable between mutant and control animals at e12.5, prior to blood flow. (C) Quantification of peritruncal vessel parameters (Controls: n=4 and *RosaCreER Smad4 fl/fl*: n=5). (D) Imaging of high magnification of arteries and capillaries at e15.5. Error bars are s.d. ns, non-significant. Cv, coronary vessels, Scale bars, B, 100  $\mu$ m and D, 50  $\mu$ m.

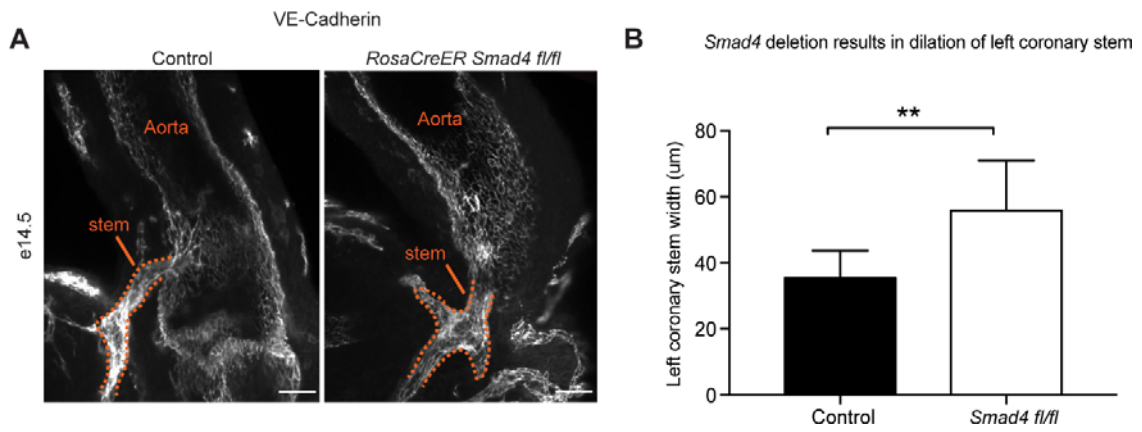

**Figure S2. The left coronary artery stem is dilated in *Smad4* mutants.** (A) Confocal image of a left coronary artery stem in a control and mutant heart. (B) Quantification of stem width (Controls: n=8 and *RosaCreER Smad4 fl/fl*: n=8). Error bars are s.d. \*\*,  $p \leq 0.01$ . Scale bars, A, 50  $\mu\text{m}$ .

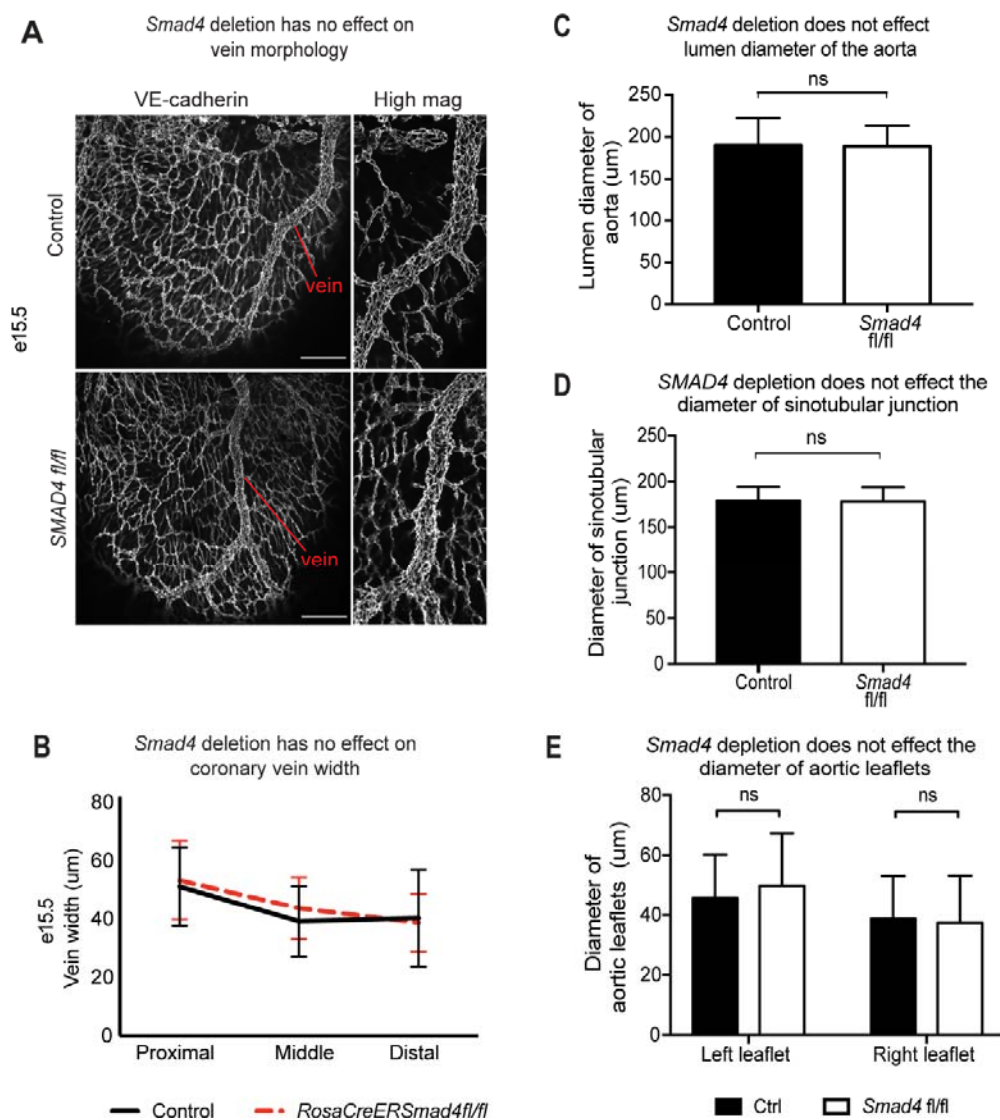

**Figure S3. Various cardiac structures with no defects in *Smad4* mutants.** (A and B) Confocal images (A) and quantification (B) of coronary veins (Controls: n=7 and *RosaCreER Smad4* fl/fl: n=8). (C-D) Measurements of the outflow tract (Controls: n=9 and *RosaCreER Smad4* fl/fl: n=10). Error bars are s.d. ns, non-significant. Scale bars, A, 100  $\mu\text{m}$ .

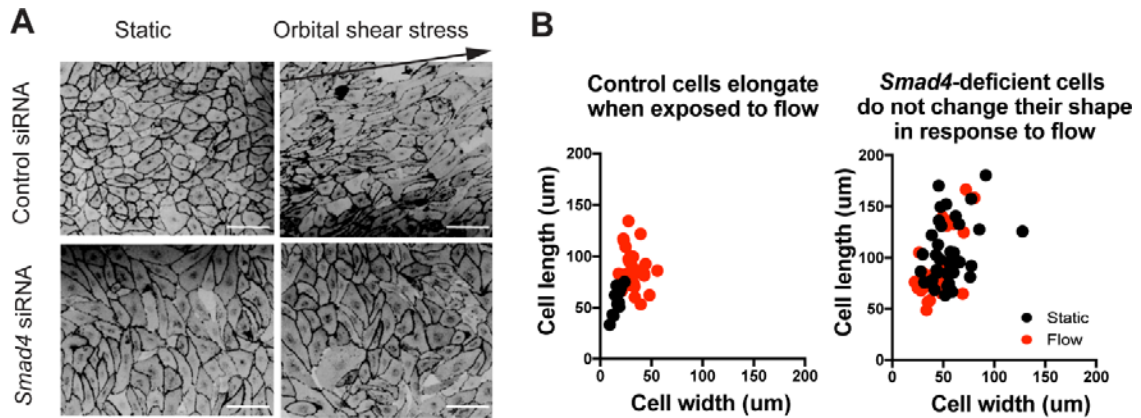

**Figure S4. Alignment of *Smad4*-deficient cells in response to shear stress imparted by orbital flow.** (A and B) Human coronary artery endothelial cells (HCAECs) exposed to orbital laminar shear stress (arrow indicates direction). (A) Cell-cell junctions are immunostained with VE-cadherin (black) showing the absence of alignment with flow when treated with *Smad4* siRNA. (B) The absence of shear stress-induced cell shape change is quantified by plotting cell length versus width. Each dot is an individual cell. Scale bar, 50 μm.

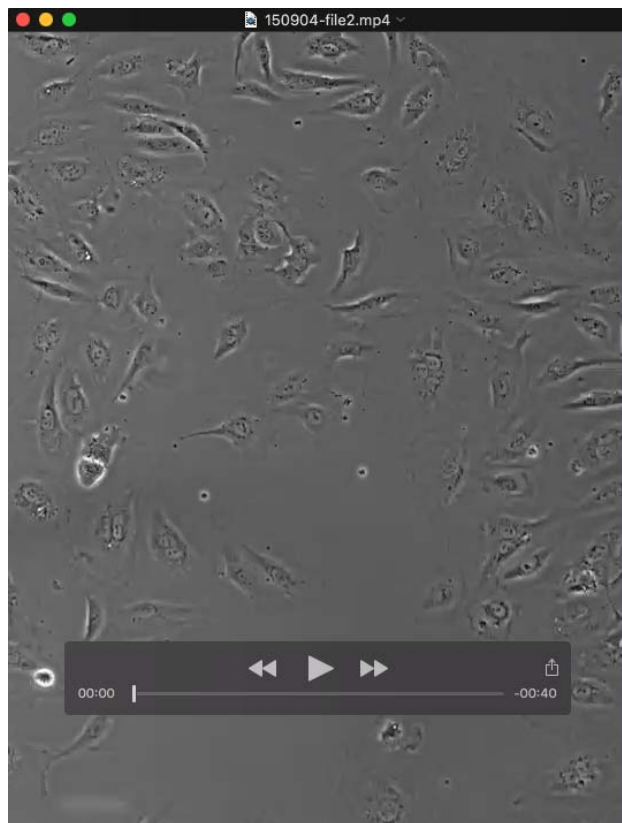

**Movie S1. Endothelial cells treated with control siRNA align and migrate against the direction of flow.** Time-lapse movie (1 frame every 15 minutes) of HCAECs treated with control siRNA subjected to shear stress at 35 dyne/cm<sup>2</sup> for 72 hours. The direction of flow is left to right.

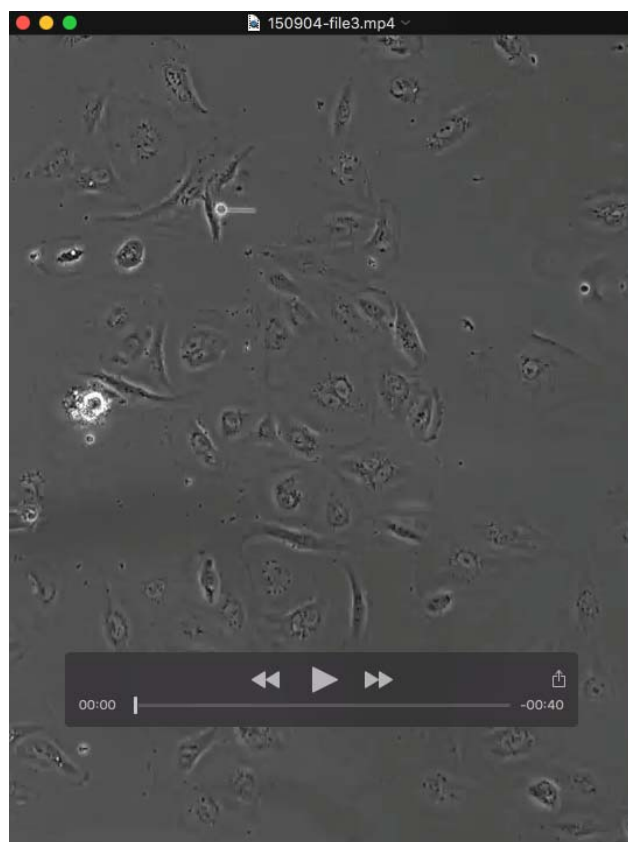

**Movie S2. Endothelial cells treated with *Smad4* siRNA do not align and migrate against the direction of flow.** Time-lapse movie (1 frame every 15 minutes) of HCAECs treated with *Smad4*-targeted siRNA subjected to shear stress at 35 dyne/cm<sup>2</sup> for 72 hours. The direction of flow is left to right.
